# Supplementary material for: Early Palliative Care for Patients with Metastatic Non–Small-Cell Lung Cancer
Source: Atypon-hosted journal article supplement (doi:10.1056/nejmoa1000678), 2010-08-18
Supplement: nejmoa1000678_appendix.pdf [file nejmoa1000678_appendix.pdf]

## Supplementary Appendix

This appendix has been provided by the authors to give readers additional information about their work.

Supplement to: Temel JS, Greer JA, Muzikansky A, et al. Early palliative care for patients with metastatic non-small-cell lung cancer. *N Engl J Med* 2010;363:733-42.

Supplemental Table 1: Ambulatory Palliative Care Guidelines

|                                                                                                                                                                                                                                                                                                                                                      |
|------------------------------------------------------------------------------------------------------------------------------------------------------------------------------------------------------------------------------------------------------------------------------------------------------------------------------------------------------|
| <p>Illness understanding/education</p> <ul style="list-style-type: none"><li>Inquire about illness and prognostic understanding</li><li>Offer clarification of treatment goals</li></ul>                                                                                                                                                             |
| <p>Symptom management – Inquire about uncontrolled symptoms with a focus on:</p> <ul style="list-style-type: none"><li>Pain</li><li>Pulmonary symptoms (cough, dyspnea)</li><li>Fatigue and sleep disturbance</li><li>Mood (depression and anxiety)</li><li>Gastrointestinal (anorexia and weight loss, nausea and vomiting, constipation)</li></ul> |
| <p>Decision-making</p> <ul style="list-style-type: none"><li>Inquire about mode of decision-making</li><li>Assist with treatment decision-making, if necessary</li></ul>                                                                                                                                                                             |
| <p>Coping with life threatening illness</p> <ul style="list-style-type: none"><li>Patient</li><li>Family/family caregivers</li></ul>                                                                                                                                                                                                                 |
| <p>Referrals/Prescriptions</p> <ul style="list-style-type: none"><li>Identify care plan for future appointments</li><li>Indicate referrals to other care providers</li><li>Note new medications prescribed</li></ul>                                                                                                                                 |

Supplemental Table 2: Healthcare Utilization Measures

| <b>Variable</b>                                        | <b>Standard Care<br/>N (%)</b> | <b>Early Palliative<br/>Care<br/>N (%)</b> |
|--------------------------------------------------------|--------------------------------|--------------------------------------------|
| <b>Chemotherapy Administration</b>                     |                                |                                            |
| Any chemotherapy within 14 days of death               | 12/50 (24.0%)                  | 7/40 (17.5%)                               |
| Any chemotherapy within 30 days of death               | 21/50 (42.0%)                  | 13/40 (32.5%)                              |
| <b>Hospitalizations</b>                                |                                |                                            |
| Any admission(s) from time of enrollment to death      | 43/56 (76.8%)                  | 36/49 (73.5%)                              |
| Any admission(s) within 30 days of death               | 30/56 (53.6%)                  | 18/49 (36.7%)                              |
| Median inpatient days (range) from enrollment to death | 7.0 (0-45)                     | 5.0 (0-50)                                 |
| <b>Emergency Department Visits</b>                     |                                |                                            |
| Any ED visit(s) from time of enrollment to death       | 32/56 (57.1%)                  | 26/49 (53.1%)                              |
| Any ED visit(s) within 30 days of death                | 17/56 (30.4%)                  | 11/49 (22.4%)                              |
| <b>Hospice Services</b>                                |                                |                                            |
| No admission to hospice                                | 22/56 (39.3%)                  | 15/49 (30.6%)                              |
| Admission to hospice $\leq$ 3 days prior to death      | 5/34 (14.7%)                   | 1/33 (3.0%)                                |
| Median days (range) on hospice                         | 4 (0-269)                      | 11 (0-117)                                 |
| <b>Location of Death</b>                               |                                |                                            |
| Home or inpatient hospice                              | 37/53 (69.8%)                  | 41/49 (83.7%)                              |
| Hospital/nursing home/rehabilitation facility          | 16/53 (30.2%)                  | 8/49 (16.3%)                               |

Supplemental Figure: CONSORT Diagram

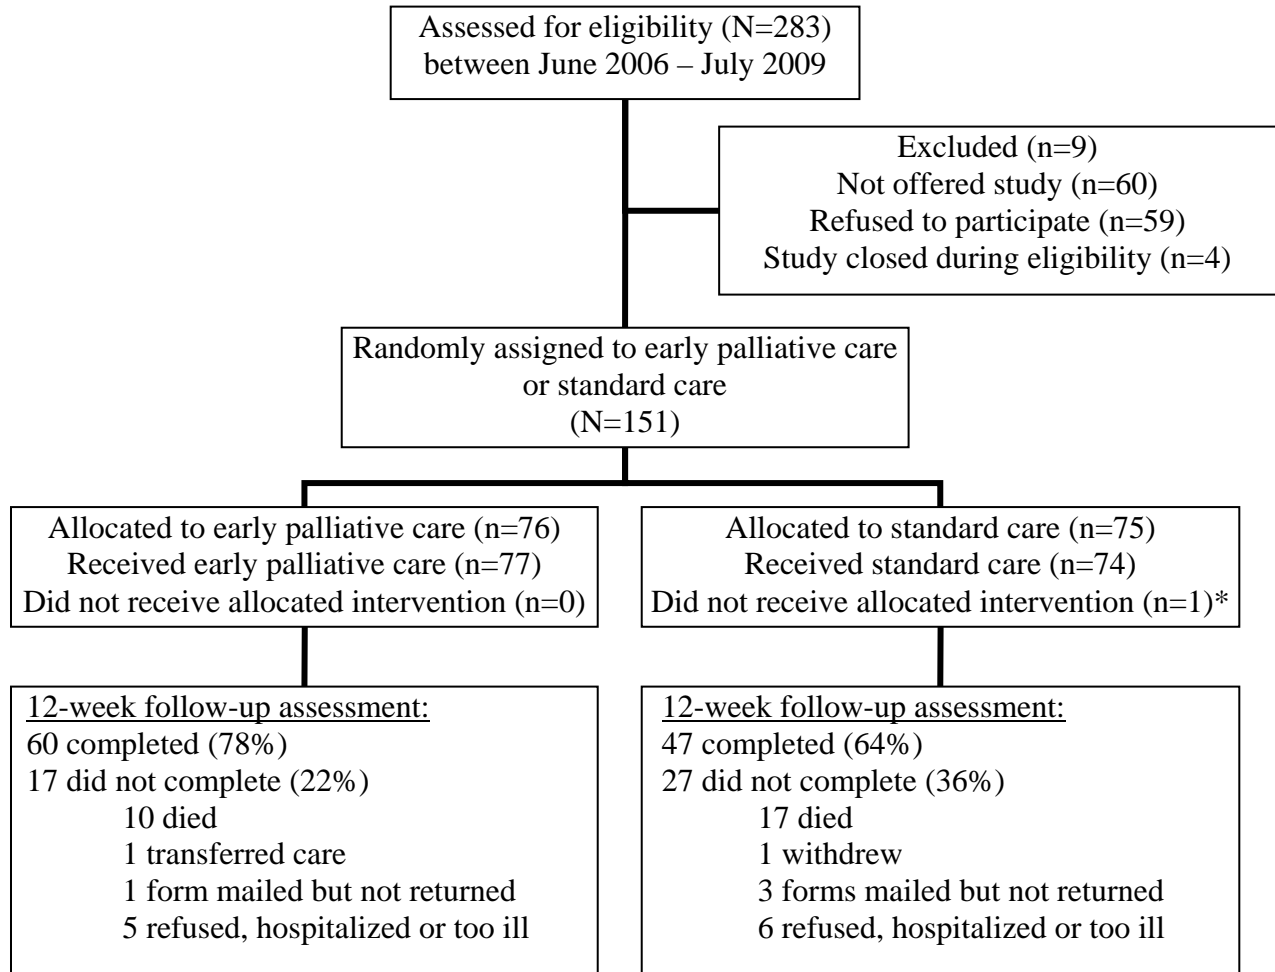

\* One patient randomized to usual care was erroneously assigned to palliative care at the time of randomization and therefore is included in the early palliative care study arm.
